# Supplementary material
Source: PubMed Central journal article supplement (PMC5994672)
Supplement: Supp_Table1.pdf [file Supp_Table1.pdf]

## Supplementary Data

SUPPLEMENTARY TABLE S1. UNADJUSTED COMPARISON OF PLASMA METABOLITES IN OBESE AND NONOBESE HIV-POSITIVE SUBJECTS

| Variables                                 | Obese (n=35)           | Nonobese (n=35)        | p           |
|-------------------------------------------|------------------------|------------------------|-------------|
| <b>Amino acids (<math>\mu</math>M)</b>    |                        |                        |             |
| Alanine                                   | 277.8 (255.0–319.4)    | 257.9 (218.0–305.1)    | <b>.05</b>  |
| Arginine                                  | 29.4 (22.0–32.6)       | 29.2 (24.4–35.1)       | .39         |
| Asparagine                                | 32.2 (28.4–35.1)       | 35.0 (32.0–38.7)       | <b>.008</b> |
| Aspartic acid                             | 4.61 (3.31–5.93)       | 3.22 (2.61–4.67)       | <b>.04</b>  |
| Citrulline                                | 29.7 (24.7–34.8)       | 31.8 (25.9–38.1)       | .44         |
| Glutamic acid                             | 43.0 (35.0–65.7)       | 32.6 (25.3–41.9)       | <b>.004</b> |
| Glutamine                                 | 343.5 (299.0–373.4)    | 397.2 (300.0–435.0)    | .08         |
| Glycine                                   | 219.7 (177.2–263.0)    | 224.0 (186.5–262.6)    | .53         |
| Histidine                                 | 69.7 (61.7–73.2)       | 69.9 (61.1–77.9)       | .71         |
| Isoleucine                                | 55.7 (50.8–64.0)       | 51.7 (46.6–63.3)       | .26         |
| Leucine                                   | 105.3 (87.8–115.6)     | 95.2 (84.0–113.8)      | .42         |
| Lysine                                    | 277.8 (254.8–320.7)    | 204.7 (150.4–237.5)    | .98         |
| Ornithine                                 | 39.9 (33.8–48.1)       | 44.4 (34.6–51.9)       | .36         |
| Phenylalanine                             | 41.7 (38.0–46.7)       | 40.5 (34.5–46.0)       | .32         |
| Proline                                   | 137.5 (110.5–156.1)    | 128.6 (109.8–169.6)    | .90         |
| Serine                                    | 70.2 (58.3–84.4)       | 72.1 (61.3–85.2)       | .63         |
| Threonine                                 | 94.4 (80.8–118.5)      | 100.9 (87.4–131.6)     | .17         |
| Tryptophan                                | 32.1 (26.5–35.3)       | 28.7 (24.8–37.8)       | .35         |
| Tyrosine                                  | 49.6 (43.0–55.0)       | 42.9 (34.0–52.6)       | <b>.03</b>  |
| Valine                                    | 185.6 (160.7–210.0)    | 171.7 (142.1–204.6)    | .10         |
| <b>Acylcarnitines (<math>\mu</math>M)</b> |                        |                        |             |
| C2                                        | 6.14 (5.11–8.64)       | 6.31 (4.01–8.65)       | .34         |
| C2:C3+C5 ratio                            | 15.0 (10.6–26.4)       | 15.1 (10.5–26.7)       | 1.0         |
| C3                                        | 0.32 (0.24–0.40)       | 0.29 (0.22–0.33)       | .45         |
| C4 butyryl                                | 0.075 (0.066–0.10)     | 0.058 (0.047–0.083)    | <b>.05</b>  |
| C4 isobutyryl                             | 0.052 (0.036–0.083)    | 0.064 (0.034–0.083)    | .88         |
| C4-DC succinyl                            | 0.0079 (0.0068–0.011)  | 0.0078 (0.0057–0.011)  | .54         |
| C4-OH butyryl                             | 0.0058 (0.0050–0.015)  | 0.0050 (0.0050–0.016)  | .48         |
| C5 2-methylbutyryl                        | 0.034 (0.025–0.042)    | 0.027 (0.023–0.035)    | .12         |
| C5 isovaleryl                             | 0.069 (0.050–0.087)    | 0.051 (0.040–0.077)    | .10         |
| C5:1                                      | 0.0032 (0.0041–0.0066) | 0.0052 (0.0038–0.0075) | .20         |
| C5-OH                                     | 0.0075 (0.0054–0.0098) | 0.0090 (0.0064–0.012)  | <b>.05</b>  |
| C6                                        | 0.032 (0.027–0.40)     | 0.034 (0.022–0.045)    | .49         |
| C8                                        | 0.096 (0.062–0.13)     | 0.092 (0.066–0.14)     | .74         |
| C8-OH                                     | 0.015 (0.012–0.023)    | 0.018 (0.011–0.023)    | .50         |
| C10                                       | 0.081 (0.062–0.12)     | 0.092 (0.056–0.14)     | .65         |
| C10-OH                                    | 0.048 (0.036–0.064)    | 0.055 (0.038–0.079)    | .23         |
| C12                                       | 0.042 (0.030–0.053)    | 0.045 (0.030–0.072)    | .43         |
| C14                                       | 0.018 (0.015–0.024)    | 0.019 (0.015–0.027)    | .52         |
| C14:1                                     | 0.054 (0.045–0.079)    | 0.052 (0.036–0.095)    | .65         |
| C14:2                                     | 0.026 (0.020–0.038)    | 0.027 (0.016–0.043)    | .95         |
| C16                                       | 0.074 (0.061–0.093)    | 0.079 (0.058–0.088)    | .77         |
| C16:2                                     | 0.0083 (0.0056–0.010)  | 0.0064 (0.0048–0.013)  | .69         |
| C18                                       | 0.032 (0.028–0.035)    | 0.034 (0.028–0.044)    | .23         |
| C18:1                                     | 0.11 (0.097–0.13)      | 0.13 (0.088–0.14)      | .57         |
| C18:2                                     | 0.087 (0.071–0.11)     | 0.10 (0.075–0.12)      | .29         |
| <b>Organic acids (<math>\mu</math>M)</b>  |                        |                        |             |
| 2-Hydroxybutyrate                         | 36.8 (28.2–48.2)       | 32.1 (23.9–47.3)       | .29         |
| 3-Hydroxybutyrate                         | 54.4 (27.2–120.1)      | 40.5 (30.5–132.4)      | .97         |
| $\alpha$ -Ketoglutarate                   | 4.54 (4.07–5.35)       | 4.60 (3.66–5.94)       | .77         |
| Lactate                                   | 987.5 (826.1–1230.1)   | 976.7 (734.2–1128.3)   | .19         |
| Pyruvate                                  | 108.3 (92.7–137.5)     | 89.4 (77.1–124.6)      | <b>.04</b>  |
| Malate                                    | 2.78 (2.43–3.41)       | 2.94 (2.51–3.65)       | .68         |
| Citrate                                   | 79.4 (69.4–93.5)       | 76.2 (65.6–95.3)       | .51         |

Metabolites are shown as median values with IQR. *p*-Values <0.05 are shown in **bold**. HIV, human immunodeficiency virus; IQR, interquartile range.
