# Supplementary material
Source: PubMed Central journal article supplement (PMC5994672)
Supplement: Supp_Table2.pdf [file Supp_Table2.pdf]

SUPPLEMENTARY TABLE S2. MULTIVARIABLE LINEAR REGRESSION MODEL FOR THE RELATIONSHIP OF INSULIN RESISTANCE WITH PLASMA METABOLITES IN HIV-POSITIVE SUBJECTS

| <i>Outcome variable</i>           | <i>Regression coefficient (95% CI)</i> | <i>p</i>        |
|-----------------------------------|----------------------------------------|-----------------|
| <b>Amino acids</b>                |                                        |                 |
| Alanine                           | 0.0008 (−0.07 to 0.07)                 | .98             |
| Arginine                          | 0.01 (−0.06 to 0.09)                   | .75             |
| Asparagine                        | −0.02 (−0.09 to 0.05)                  | .59             |
| Aspartic acid                     | 0.005 (−0.07 to 0.08)                  | .89             |
| Citrulline                        | −0.04 (−0.11 to 0.03)                  | .27             |
| Glutamic acid                     | 0.13 (0.05 to 0.21)                    | <b>.001</b>     |
| Glutamine                         | −0.01 (−0.09 to 0.06)                  | .69             |
| Glycine                           | −0.07 (−0.17 to 0.02)                  | .12             |
| Histidine                         | −0.02 (−0.10 to 0.07)                  | .70             |
| Isoleucine                        | 0.07 (−0.02 to 0.16)                   | .13             |
| Leucine                           | 0.04 (−0.05 to 0.14)                   | .36             |
| Lysine                            | 0.01 (−0.03 to 0.06)                   | .49             |
| Ornithine                         | 0.06 (−0.02 to 0.14)                   | .12             |
| Phenylalanine                     | 0.04 (−0.02 to 0.11)                   | .19             |
| Proline                           | 0.03 (−0.02 to 0.08)                   | .28             |
| Serine                            | 0.04 (−0.05 to 0.13)                   | .37             |
| Threonine                         | 0.02 (−0.06 to 0.09)                   | .60             |
| Tryptophan                        | 0.05 (−0.03 to 0.14)                   | .20             |
| Tyrosine                          | 0.12 (0.06 to 0.18)                    | <b>&lt;.001</b> |
| Valine                            | 0.05 (−0.04 to 0.15)                   | .29             |
| <b>Acylcarnitines<sup>a</sup></b> |                                        |                 |
| C2                                | −0.06 (−0.12 to −0.006)                | <b>.03</b>      |
| C2:C3+C5 ratio                    | −0.11 (−0.19 to −0.03)                 | <b>.006</b>     |
| C3                                | 0.12 (0.03 to 0.21)                    | <b>.01</b>      |
| C4 butyryl                        | −0.007 (−0.04 to 0.03)                 | .70             |
| C4 isobutyryl                     | −0.003 (−0.08 to 0.07)                 | .94             |
| C4-DC succinyl                    | 0.02 (−0.05 to 0.08)                   | .60             |
| C4-OH butyryl                     | −0.03 (−0.06 to 0.003)                 | .07             |
| C5 2-methylbutyryl                | 0.009 (−0.07 to 0.09)                  | .83             |
| C5 isovaleryl                     | 0.08 (−0.02 to 0.18)                   | .12             |
| C5:1                              | −0.01 (−0.09 to 0.07)                  | .82             |
| C5-OH                             | −0.13 (−0.22 to −0.04)                 | <b>.006</b>     |
| C6                                | −0.06 (−0.14 to 0.02)                  | .12             |
| C8                                | −0.04 (−0.09 to 0.005)                 | .08             |
| C8-OH                             | −0.07 (−0.12 to −0.006)                | <b>.03</b>      |
| C10                               | −0.05 (−0.10 to −0.004)                | <b>.04</b>      |
| C10-OH                            | −0.07 (−0.12 to −0.03)                 | <b>.003</b>     |
| C12                               | −0.05 (−0.10 to −0.004)                | <b>.03</b>      |
| C14                               | −0.06 (−0.14 to 0.009)                 | .08             |
| C14:1                             | −0.06 (−0.12 to −0.008)                | <b>.03</b>      |
| C14:2                             | −0.05 (−0.11 to 0.004)                 | .07             |
| C16                               | −0.08 (−0.14 to −0.009)                | <b>.03</b>      |
| C16:2                             | −0.003 (−0.06 to 0.05)                 | .91             |
| C18                               | −0.10 (−0.18 to −0.02)                 | <b>.01</b>      |
| C18:1                             | −0.11 (−0.17 to −0.04)                 | <b>.002</b>     |
| C18:2                             | −0.06 (−0.14 to 0.02)                  | .16             |
| <b>Organic acids</b>              |                                        |                 |
| 2-Hydroxybutyrate                 | −0.02 (−0.08 to 0.03)                  | .40             |
| 3-Hydroxybutyrate                 | −0.03 (−0.07 to 0.02)                  | .20             |
| α-Ketoglutarate                   | −0.01 (−0.03 to 0.06)                  | .56             |
| Lactate                           | 0.01 (−0.06 to 0.08)                   | .77             |
| Pyruvate                          | 0.04 (−0.03 to 0.12)                   | .24             |
| Malate                            | 0.0001 (−0.06 to 0.06)                 | 1.0             |
| Citrate                           | −0.02 (−0.07 to 0.03)                  | .50             |

Multivariable model adjusted for age, sex, CD4<sup>+</sup> count at enrollment (square root transformed), duration of antiretroviral treatment, smoking status, and fat mass index. The dependent variable (HOMA2) was log-transformed, so regression coefficients represent the change in log(HOMA2) from the 25th to the 75th percentile of the metabolite. *p*-Values <.05 are shown in *bold*.

<sup>a</sup>C5 valeryl was excluded from the multivariable analyses as 29 subjects (41%) had a level below the 0.0025 μM limit of detection.

CI, confidence interval; HOMA, Homeostasis Model Assessment.
